# Supplementary material for: Plasma Exosomes Transfer miR-885-3p Targeting the AKT/NFκB Signaling Pathway to Improve the Sensitivity of Intravenous Glucocorticoid Therapy Against Graves Ophthalmopathy
Source: PubMed Central journal article supplement (PMC8900193; doi:10.3389/fimmu.2022.819680), 2022-02-21

### SI-exo

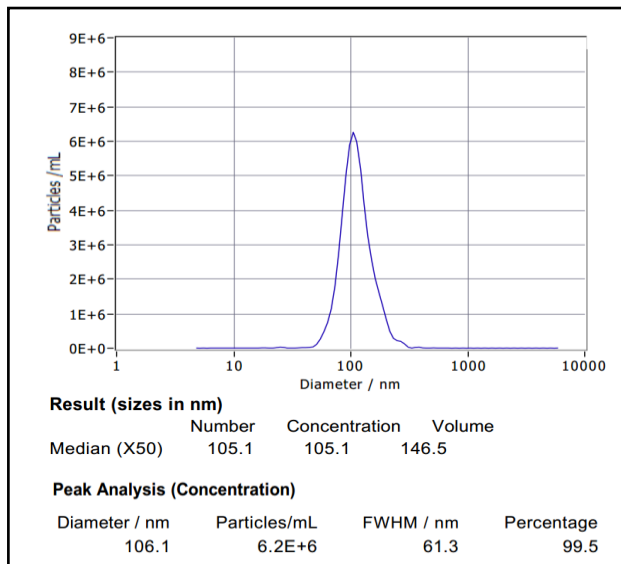

### NSI-exo

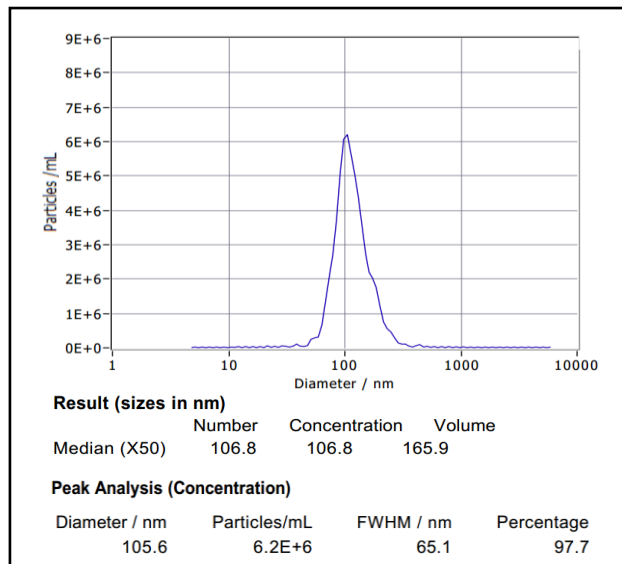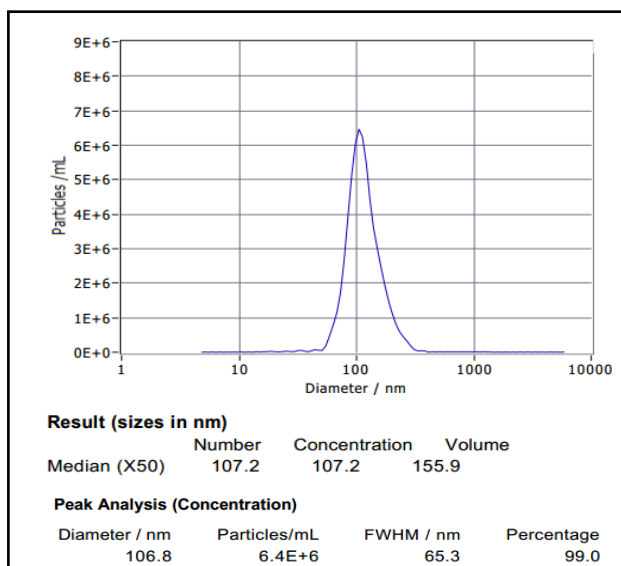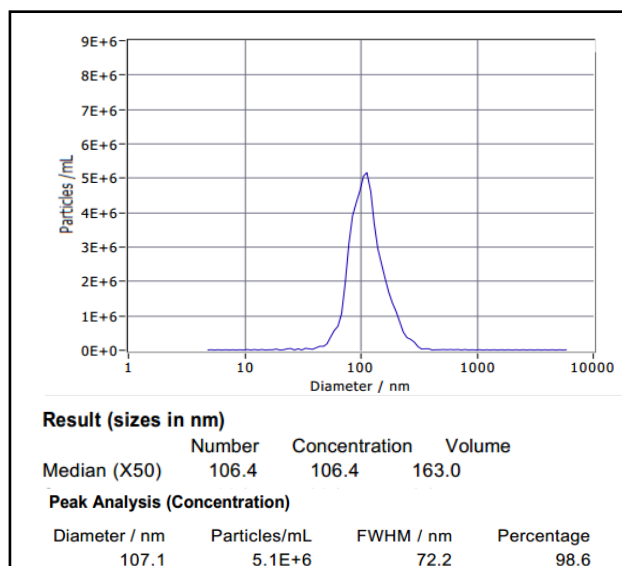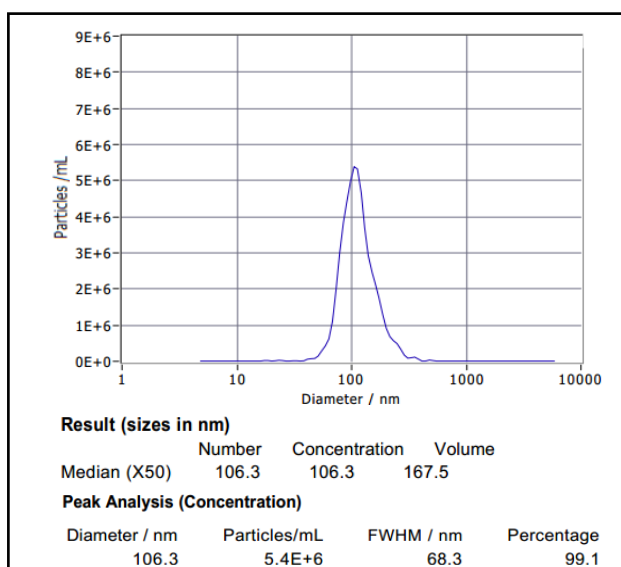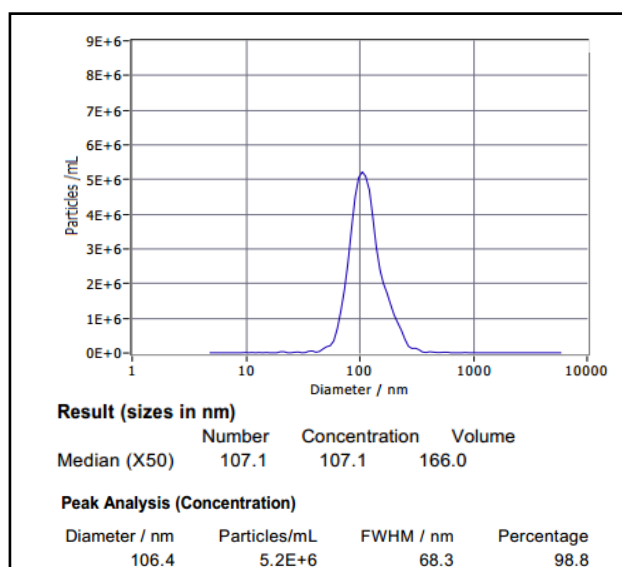

Supplement: DataSheet_1.pdf [file DataSheet_1.pdf]
